# Supplementary material for: Impact and process evaluation of a primary-school Food Education and Sustainability Training (FEAST) program in 10-12-year-old children in Australia: pragmatic cluster non-randomized controlled trial
Source: Springer Nature journal article supplement (doi:10.1186/s12889-024-18079-8), 2024-03-01

# FEAST Evaluation

## What do you think about FEAST?

|                                               | Yes                   | No                    |
|-----------------------------------------------|-----------------------|-----------------------|
| Were the FEAST activities easy to read?       | <input type="radio"/> | <input type="radio"/> |
| Were the FEAST activities easy to understand? | <input type="radio"/> | <input type="radio"/> |
| Was the FEAST website easy to use?            | <input type="radio"/> | <input type="radio"/> |
| Was the FEAST program fun?                    | <input type="radio"/> | <input type="radio"/> |

## During school closures, when you were learning from home ...

|                                                                  | Yes                   | No                    |
|------------------------------------------------------------------|-----------------------|-----------------------|
| Were the FEAST lessons easy to do from home?                     | <input type="radio"/> | <input type="radio"/> |
| Did you do the FEAST lessons online?                             | <input type="radio"/> | <input type="radio"/> |
| Did you cook some of the FEAST recipes with your family at home? | <input type="radio"/> | <input type="radio"/> |
| Were the FEAST cooking activities easy to do at home?            | <input type="radio"/> | <input type="radio"/> |
| Did you enjoy cooking with your family?                          | <input type="radio"/> | <input type="radio"/> |
| Would you like to continue cooking with your family?             | <input type="radio"/> | <input type="radio"/> |

## Cooking with Classmates

Did you participate in the cooking activities at school with your class?

- Yes  
 No

Did you enjoy cooking in class with your classmates?

- Yes  
 No

Did you learn something about food preparation and cooking that you did not know before?

- Yes  
 No

Name one new thing you learnt to do during the FEAST cooking activities.

---

Which was your favourite FEAST recipe?

Choose as many as you like.

- Peach Parfait
- Fruit Skewers with Natural Yoghurt
- Muesli Bliss Balls
- Tzatziki Dip with Vegetable Sticks
- Quick Pickle Vegetables
- Bircher Muesli with Apples and Bananas
- Rainbow Salad Roll
- Sandwich Sushi
- Chicken & Lentil Kofta Pita Pockets
- Crunchy Noodle Salad
- Banana Pikelets
- Turkish Carrot & Yoghurt Dip
- Fast Fritters
- From-the-Fridge Omelette
- French Toast
- Wholemeal Burrito Wrap
- Rainbow Honey Soy Noodle Stir Fry
- San Choy Bau
- Tortilla Wraps
- Butter Bean Hummus
- None of them

---

Did your class create a cookbook?

- Yes
- No

---

Did you enjoy creating the cookbook?

- Yes
- No

---

On a scale of 0 to 10, how likely are you to recommend the FEAST program to others?

- 10, Extremely likely to Recommend
- 9
- 8
- 7
- 6
- 5
- 4
- 3
- 2
- 1
- 0, Not likely to Recommend

---

Would you like to do the FEAST program again?

- Yes
- No

---

Remember to click on the "FINISH" button

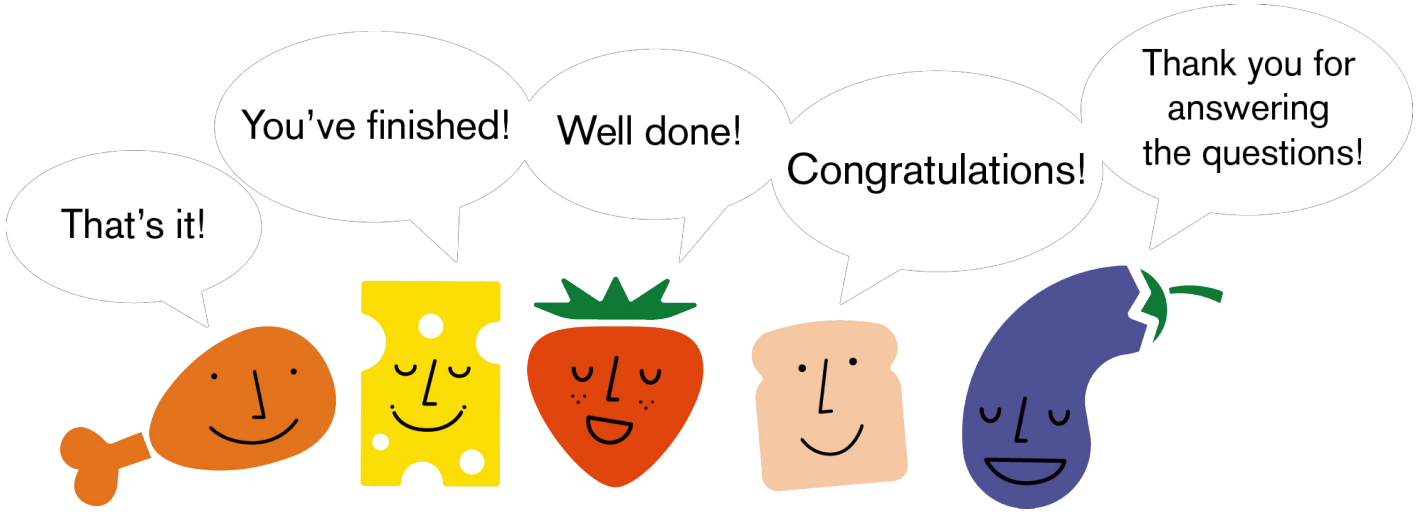

Supplement: MOESM2 [file 26810800]
