# Supplementary material for: Impact and process evaluation of a primary-school Food Education and Sustainability Training (FEAST) program in 10-12-year-old children in Australia: pragmatic cluster non-randomized controlled trial
Source: Springer Nature journal article supplement (doi:10.1186/s12889-024-18079-8), 2024-03-01
Supplement: MOESM4 [file 26810800]

**Additional file 4: Teacher surveys - FEAST lessons plans used by teachers during Implementation (n=9 teachers, n=15 class groups)**

| Lesson # | FEAST LESSON PLANS used by teachers          | No. of Classes<br>using each lesson plan | % of Classes<br>using each lesson plan |
|----------|----------------------------------------------|------------------------------------------|----------------------------------------|
| 1        | The essential question and scenario          | 8/15                                     | 53.3%                                  |
| 2        | Understanding food waste                     | 8/15                                     | 53.3%                                  |
| 3        | Change-makers and where does food come from? | 8/15                                     | 53.3%                                  |
| 4        | Using STEM Thinking for Problem Solving      | 2/15                                     | 13.3%                                  |
| 5        | Understanding food waste                     | 8/15                                     | 53.3%                                  |
| 6        | Learning about healthy eating                | 7/15                                     | 46.6%                                  |
| 7        | Generating Ideas                             | 5/15                                     | 33.3%                                  |
| 8        | Finalising the recipe                        | 5/15                                     | 33.3%                                  |
| 9        | Recipe Presentation                          | 3/15                                     | 20.0%                                  |
| 10       | Debrief                                      | 3/15                                     | 20.0%                                  |
|          | Optional Learning Experiences                | 0/15                                     | 0.0%                                   |
