# Supplementary material for: Impact and process evaluation of a primary-school Food Education and Sustainability Training (FEAST) program in 10-12-year-old children in Australia: pragmatic cluster non-randomized controlled trial
Source: Springer Nature journal article supplement (doi:10.1186/s12889-024-18079-8), 2024-03-01
Supplement: MOESM5 [file 26810800]

**Additional file 5: Teacher Survey – teacher’s perceptions of student’s learnings during the FEAST program (n=9 teachers)**

|                                                                                                   | Strongly agree | Agree | Neutral | Disagree | Strongly disagree | NA | DNR |
|---------------------------------------------------------------------------------------------------|----------------|-------|---------|----------|-------------------|----|-----|
| My students found the FEAST activities easy to follow in the classroom.                           | 2              | 5     | 0       | 1        | 0                 | 0  | 1   |
| My students found the FEAST activities engaging in the classroom.                                 | 3              | 4     | 0       | 1        | 0                 | 0  | 1   |
| My students found the FEAST website easy to navigate in the classroom.                            | 2              | 2     | 0       | 1        | 0                 | 3  | 1   |
| My students found FEAST online theory lessons easy to do at home during COVID-19 school closures. | 3              | 0     | 2       | 1        | 0                 | 0  | 1   |
| My students found FEAST cooking activities easy to do at home during COVID-19 school closures.    | 4              | 0     | 1       | 1        | 0                 | 2  | 1   |
| The FEAST program helped students to understand why it is important to be aware of food waste     | 5              | 3     | 0       | 0        | 0                 | 0  | 1   |
| Students are able to understand which behaviours can reduce food waste in the home and at school. | 2              | 6     | 0       | 0        | 0                 | 0  | 1   |
| Students have increased knowledge and understanding of food waste on a local level.               | 3              | 5     | 0       | 0        | 0                 | 0  | 1   |
| Students have increased knowledge and understanding of food waste on a global level.              | 2              | 6     | 0       | 0        | 0                 | 0  | 1   |
| My students understand where food comes from.                                                     | 3              | 5     | 0       | 0        | 0                 | 0  | 1   |
| My students understand how to make healthier food choices.                                        | 3              | 5     | 0       | 0        | 0                 | 0  | 1   |
| My students understand how to prepare and cook food.                                              | 4              | 4     | 0       | 0        | 0                 | 0  | 1   |
| My students understand how to minimise food waste.                                                | 2              | 6     | 0       | 0        | 0                 | 0  | 1   |
| My students are eating more fruits and vegetables.                                                | 3              | 3     | 2       | 0        | 0                 | 0  | 1   |
| My students are eating less 'junk' food.                                                          | 2              | 2     | 3       | 1        | 0                 | 0  | 1   |

Legend: *NA* Not applicable; *DNR* Did not respond
