# Supplementary material for: Impact and process evaluation of a primary-school Food Education and Sustainability Training (FEAST) program in 10-12-year-old children in Australia: pragmatic cluster non-randomized controlled trial
Source: Springer Nature journal article supplement (doi:10.1186/s12889-024-18079-8), 2024-03-01
Supplement: MOESM6 [file 26810800]

**Additional file 6: Teacher Survey – teacher’s rating FEAST educational content and program delivery (n=9 teachers)**

|                                                                                           | Strongly agree | Agree | Neutral | Disagree | Strongly disagree | NA | DNR |
|-------------------------------------------------------------------------------------------|----------------|-------|---------|----------|-------------------|----|-----|
| The FEAST program content satisfactorily aligned with the identified Year 5 & 6 KLAs      | 2              | 6     | 0       | 0        | 0                 | 0  | 1   |
| The FEAST program satisfactorily aligned with cross-curriculum priority of sustainability | 5              | 3     | 0       | 0        | 0                 | 0  | 1   |
| I found the STEM lesson plans easy to implement in my classroom                           | 2              | 3     | 1       | 0        | 0                 | 2  | 1   |
| The FEAST program satisfactorily aligned with the general capabilities                    | 2              | 5     | 1       | 0        | 0                 | 0  | 1   |
| The FEAST program met my student's learning need                                          | 4              | 4     | 0       | 0        | 0                 | 0  | 1   |
| The FEAST website was easy for me to navigate                                             | 3              | 2     | 1       | 2        | 0                 | 0  | 1   |
| The FEAST program was easy to integrate face-to-face into my daily classroom routine      | 4              | 2     | 1       | 1        | 0                 | 0  | 1   |
| The FEAST program was easy to teach remotely during COVID-19 school closures              | 1              | 2     | 2       | 2        | 1                 | 0  | 1   |

Legend: *DNR* Did not respond; *NA* Not Applicable; *KLAs* Key Learning Areas in the Australian Curriculum i.e. English, STEM (Science, Technology, Engineering, and Mathematics), Health and Physical Education; General capabilities (Literacy and Numeracy)
