# Supplementary material for: Impact and process evaluation of a primary-school Food Education and Sustainability Training (FEAST) program in 10-12-year-old children in Australia: pragmatic cluster non-randomized controlled trial
Source: Springer Nature journal article supplement (doi:10.1186/s12889-024-18079-8), 2024-03-01
Supplement: MOESM7 [file 26810800]

**Additional file 7: Teacher surveys – teacher’s satisfaction with FEAST teacher training courses**

|                                                                                                                              | Strongly agree | Agree | Neutral | Disagree | Strongly disagree | NA  |
|------------------------------------------------------------------------------------------------------------------------------|----------------|-------|---------|----------|-------------------|-----|
| Q. The FEAST face-to-face training course prepared me to deliver the FEAST program in the following setting (n=3 teachers)   |                |       |         |          |                   |     |
| Classroom setting                                                                                                            | 3/3            |       |         |          |                   |     |
| Home setting                                                                                                                 |                | 1/3   | 2/3     |          |                   |     |
| The FEAST online training course prepared me to deliver the FEAST program in the following setting (n=6 teachers)            |                |       |         |          |                   |     |
| Classroom setting                                                                                                            | 3/6            | 2/6   | 1/6     |          |                   |     |
| Home setting                                                                                                                 | 1/6            | 2/6   |         | 2/6      |                   | 1/6 |
| Did you find the Teacher Professional Development Training course delivered by OzHarvest effective when they delivered it as |                |       |         |          |                   |     |
| Face-to-face Training                                                                                                        | 3/3            |       |         |          |                   |     |
| Online Training                                                                                                              | 1/6            | 5/6   |         |          |                   |     |

Legend: NA Not applicable; n=3 teachers undertook face-to-face training; n=6 teachers undertook online training
