# Supplementary material for: Impact and process evaluation of a primary-school Food Education and Sustainability Training (FEAST) program in 10-12-year-old children in Australia: pragmatic cluster non-randomized controlled trial
Source: Springer Nature journal article supplement (doi:10.1186/s12889-024-18079-8), 2024-03-01
Supplement: MOESM8 [file 26810800]

**Additional file 8: FEAST Student Surveys (Intervention Schools ) - Satisfaction of Program N=261**

| FEAST Intervention Student Questions                                                              | No. (%) of students responding 'yes' | No. (%) of students responding 'no' | No. (%) of students not responding |
|---------------------------------------------------------------------------------------------------|--------------------------------------|-------------------------------------|------------------------------------|
| Were the FEAST activities easy to read?                                                           | 232 (88.9)                           | 13 (4.9)                            | 16 (6.1)                           |
| Were the FEAST activities easy to understand                                                      | 223 (85.4)                           | 22 (8.4)                            | 16 (6.1)                           |
| Was the FEAST website easy to use?                                                                | 229 (87.7)                           | 16 (6.1)                            | 16 (6.1)                           |
| Was the FEAST program fun?                                                                        | 212 (81.2)                           | 33 (12.6)                           | 16 (6.1)                           |
| Were the FEAST lessons easy to do from home?                                                      | 180 (68.9)                           | 61 (23.4)                           | 20 (7.7)                           |
| Did you do the FEAST lessons online?                                                              | 170 (65.1)                           | 70 (26.8)                           | 21 (8.1)                           |
| Did you cook some of the FEAST recipes with your family at home?                                  | 131 (50.2)                           | 109 (41.7)                          | 21 (8.1)                           |
| Were the FEAST cooking activities easy to do at home?                                             | 118 (45.2)                           | 9 (3.5)                             | 133 (50.9)                         |
| Did you enjoy cooking with your family?                                                           | 122(46.7)                            | 7 (2.7)                             | 132 (50.6)                         |
| Would you like to continue cooking with your family?                                              | 121 (46.4)                           | 8 (3.0)                             | 132 (50.6)                         |
| Did you participate in the cooking activities at school with your class?                          | 229 (87.8)                           | 16 (6.1)                            | 16 (6.1)                           |
| Did you enjoy cooking in class with your classmates?                                              | 217 (83.1)                           | 10 (3.8)                            | 34 (13.1)                          |
| Did you learn something about food preparation and cooking that you did not know before?          | 172 (65.9)                           | 59 (22.6)                           | 30 (11.5)                          |
| Did your class create a cookbook?                                                                 | 94 (36.1)                            | 142 (54.4)                          | 25 (9.6)                           |
| Did you enjoy creating the cookbook?                                                              | 79 (30.3)                            | 11 (4.2)                            | 171 (65.5)                         |
| Would you like to do the FEAST program again?                                                     | 192 (73.6)                           | 45 (17.2)                           | 24 (9.2)                           |
| Which was your favourite FEAST recipe? French Toast (Most popular)                                | 85 (32.6)                            | NA                                  | NA                                 |
| Which was your favourite FEAST recipe? Banana Pikelets                                            | 50 (19.2)                            | NA                                  | NA                                 |
| Which was your favourite FEAST recipe? Fruit Skewers with Natural Yoghurt                         | 46 (17.6)                            | NA                                  | NA                                 |
| Which was your favourite FEAST recipe? Fast Fritters (with vegetables)                            | 37 (14.2)                            | NA                                  | NA                                 |
| Which was your favourite FEAST recipe? Crunchy Noodle Salad                                       | 34 (13.0)                            | NA                                  | NA                                 |
| Which was your favourite FEAST recipe? Chicken & Lentil Kofta Pita Pockets (Least popular recipe) | 3 (1.3)                              | NA                                  | NA                                 |
| Number of students reporting they did not like any recipes.                                       | 54 (20.1)                            | NA                                  | NA                                 |
