# Supplementary material for: Impact and process evaluation of a primary-school Food Education and Sustainability Training (FEAST) program in 10-12-year-old children in Australia: pragmatic cluster non-randomized controlled trial
Source: Springer Nature journal article supplement (doi:10.1186/s12889-024-18079-8), 2024-03-01
Supplement: MOESM9 [file 26810800]

**Additional file 9: Teacher Survey – Teacher satisfaction of FEAST resources during COVID-19 school-closures n=9**

| Resources                                                                                                                                                                        | Very effective | Effective | Moderately effective | Slightly effective | Not effective | Did not use this resource | DNR |
|----------------------------------------------------------------------------------------------------------------------------------------------------------------------------------|----------------|-----------|----------------------|--------------------|---------------|---------------------------|-----|
| During school closures, when students were learning from HOME, please rate the effectiveness of the FEAST online learning resources, in aiding you to deliver the FEAST program. |                |           |                      |                    |               |                           |     |
| Teacher Instructions                                                                                                                                                             | 1              | 1         |                      | 2                  |               | 1                         | 4   |
| 8 Interactive Lessons                                                                                                                                                            |                | 2         |                      |                    |               | 3                         | 4   |
| Practical Learning                                                                                                                                                               | 1              | 1         | 1                    |                    |               | 2                         | 4   |
| Online individual support from OzHarvest                                                                                                                                         |                | 1         |                      |                    |               | 4                         | 4   |

Legend: DNR Did not respond
