# Supplementary material for: Impact and process evaluation of a primary-school Food Education and Sustainability Training (FEAST) program in 10-12-year-old children in Australia: pragmatic cluster non-randomized controlled trial
Source: Springer Nature journal article supplement (doi:10.1186/s12889-024-18079-8), 2024-03-01
Supplement: MOESM10 [file 26810800]

**Additional file 10: Teacher Survey – Teacher satisfaction of FEAST Resources (n=9 teachers)**

| Resources                                                                                                  | Very effective | Effective | Moderately effective | Slightly effective | Not effective | Did not use this resource | Did not receive resource |
|------------------------------------------------------------------------------------------------------------|----------------|-----------|----------------------|--------------------|---------------|---------------------------|--------------------------|
| Please rate the effectiveness of the FEAST resources provided, in aiding you to deliver the FEAST program. |                |           |                      |                    |               |                           |                          |
| Online teacher portal                                                                                      | 3              | 2         | 1                    | 2                  | 0             | 1                         | NA                       |
| Online student portal                                                                                      | 1              | 2         | 0                    | 0                  | 0             | 6                         | NA                       |
| Student resources                                                                                          | 3              | 3         | 1                    | 1                  | 0             | 1                         | NA                       |
| FEAST unit of work                                                                                         | 3              | 4         | 1                    | 1                  | 0             | 0                         | NA                       |
| STEM lesson plans                                                                                          | 3              | 3         | 0                    | 1                  | 0             | 2                         | NA                       |
| FEAST practical guide                                                                                      | 4              | 5         | 0                    | 0                  | 0             | 0                         | NA                       |
| Kitchen Kit                                                                                                | 7              | 1         | 0                    | 0                  | 0             | 1                         | NA                       |
| Cold recipe book                                                                                           | 6              | 3         | 0                    | 0                  | 0             | 0                         | NA                       |
| Hot recipe book                                                                                            | 6              | 3         | 0                    | 0                  | 0             | 0                         | NA                       |
| Optional learning experiences                                                                              | 2              | 3         | 0                    | 0                  | 0             | 4                         | NA                       |

Legend: NA Not applicable
