# Supplementary material for: Impact and process evaluation of a primary-school Food Education and Sustainability Training (FEAST) program in 10-12-year-old children in Australia: pragmatic cluster non-randomized controlled trial
Source: Springer Nature journal article supplement (doi:10.1186/s12889-024-18079-8), 2024-03-01
Supplement: MOESM11 [file 26810800]

**Additional file 11 : FEAST Student Survey (Intervention Schools) – Skills learnt during food preparation and cooking activities (n=172)**

| Skills or Knowledge learnt during food preparation and cooking activities | No. of students | % of students |
|---------------------------------------------------------------------------|-----------------|---------------|
| How to make a specific recipe (Most popular)                              | 36/172          | 20.93%        |
| How to cook                                                               | 27/172          | 15.7%         |
| About food waste                                                          | 25/172          | 14.5%         |
| How to measure/cut/dice/mix                                               | 13/172          | 7.6%          |
| How to use utensils/cooking equipment                                     | 10/172          | 5.8%          |
| How to cook with friends                                                  | 7/172           | 4.1%          |
| How to cook with imperfect foods                                          | 6/172           | 3.5%          |
| Miscellaneous                                                             | 27/172          | 15.7%         |

Legend: Of the 261 FEAST intervention students that responded to the post-FEAST survey 172 (65.95%) replied 'yes' they learnt a new skill
