# Supplementary material for: Impact and process evaluation of a primary-school Food Education and Sustainability Training (FEAST) program in 10-12-year-old children in Australia: pragmatic cluster non-randomized controlled trial
Source: Springer Nature journal article supplement (doi:10.1186/s12889-024-18079-8), 2024-03-01
Supplement: MOESM12 [file 26810800]

**Additional file 12: Teacher Survey – reports of other nutrition and/or sustainability programmes implemented in intervention schools (n=10 Schools)**

| <b>Program</b>                                  | <b>School 1</b> | <b>School 4</b> | <b>School 7</b> | <b>School 8</b> | <b>School 12</b> | <b>School 13</b> | <b>School 18</b> | <b>School 3</b> | <b>School 10</b> | <b>School 11</b> |
|-------------------------------------------------|-----------------|-----------------|-----------------|-----------------|------------------|------------------|------------------|-----------------|------------------|------------------|
| Crunch&Sip®                                     | ✓               |                 |                 | ✓               | ✓                | ✓                | ✓                | DNR             | WD               | WD               |
| Kitchen Garden                                  | ✓               | ✓               | ✓               | ✓               | ✓                | ✓                | ✓                | DNR             | WD               | WD               |
| Composting                                      |                 | ✓               |                 | ✓               | ✓                | ✓                |                  | DNR             | WD               | WD               |
| Sustainability/environment student group        | ✓               |                 |                 | ✓               |                  | ✓                | ✓                | DNR             | WD               | WD               |
| Community - farm visits                         |                 |                 |                 |                 |                  | ✓                |                  | DNR             | WD               | WD               |
| Fruit and Vegetable stalls                      |                 |                 |                 |                 |                  | ✓                |                  | DNR             | WD               | WD               |
| Emergency food programmes - e.g. breakfast club | ✓               | ✓               |                 |                 |                  | ✓                |                  | DNR             | WD               | WD               |
| Healthy canteen policy                          |                 |                 |                 |                 | ✓                | ✓                |                  | DNR             | WD               | WD               |
| Sustainability policy                           | ✓               |                 |                 |                 |                  | ✓                | ✓                | DNR             | WD               | WD               |
| Other (Native bees, tree planting)              |                 | ✓               |                 |                 |                  |                  |                  | DNR             | WD               | WD               |
| <b>Totals</b>                                   | <b>5/9</b>      | <b>3/9+</b>     | <b>1/9</b>      | <b>4/9</b>      | <b>4/9</b>       | <b>9/9</b>       | <b>4/9</b>       |                 |                  |                  |

Legend: *Crunch&Sip*® is a set time in primary schools in two Australian states (i.e. New South Wales and Western Australia), for students to 'refuel' on vegetables, salad and/or fruit and 'rehydrate' with water (schools choose whether they want to implement it) ; *DNR* Did not respond; *WD* Schools withdrew after baseline data collection and teachers were not available for post-intervention surveys; + teachers responding that they have other nutrition and/or sustainability programmes in their school, other than those listed on survey list.
